# Supplementary material for: Evaluation of Business Models for Fecal Sludge Emptying and Transport in Informal Settlements of Kampala, Uganda
Source: MDPI journal article supplement (doi:10.3390/w14182914), 2022-09-17
Supplement: s1 [file s1]

| Service criteria        | Sub-criteria                                                                                                                                                   | Business model   |                    |                      |           |                       |             |            |                                   | Scoring                                                                                                          |
|-------------------------|----------------------------------------------------------------------------------------------------------------------------------------------------------------|------------------|--------------------|----------------------|-----------|-----------------------|-------------|------------|-----------------------------------|------------------------------------------------------------------------------------------------------------------|
|                         |                                                                                                                                                                | Transfer station | Franchise (Zoning) | Scheduled desludging | Licensing | Incentivised disposal | Call center | Non-profit | Discreet collection and treatment |                                                                                                                  |
| Financial               | <b>Business profitability:</b> Does the model increase business profitability of private emptiers?                                                             | NA               | 0.5                | 1                    | 0         | 1                     | 1           | 0          | 1                                 | 1: Business model increases business profitability through revenue gains or reduced operational costs            |
|                         |                                                                                                                                                                |                  |                    |                      |           |                       |             |            |                                   | 0.5: Business model likely to increase business profitability through revenue gains or reduced operational costs |
|                         |                                                                                                                                                                |                  |                    |                      |           |                       |             |            |                                   | 0: Business model does not increase business profitability through revenue gains or reduced operational costs    |
|                         | <b>Emptying costs/ fees:</b> Does the business model reduce emptying costs to households?                                                                      | NA               | 0.5                | 0.5                  | 0         | 0.5                   | 0.5         | 0          | 0.5                               | 1: Reduces emptying costs to users of on-site sanitation facilities                                              |
|                         |                                                                                                                                                                |                  |                    |                      |           |                       |             |            |                                   | 0.5: Likely to reduce emptying costs to users of on-site sanitation facilities                                   |
|                         |                                                                                                                                                                |                  |                    |                      |           |                       |             |            |                                   | 0: Does not reduce emptying costs to users of on-site sanitation facilities                                      |
|                         | <b>Subsidy:</b> Does the design of the business require subsidy/ incentives ?                                                                                  | NA               | 0.5                | 0.5                  | 0.5       | 0                     | 0.5         | 0          | 0.5                               | 1: Support from government or donors is not required for business operations                                     |
|                         |                                                                                                                                                                |                  |                    |                      |           |                       |             |            |                                   | 0.5: Likely to require support from government or donors for business operations                                 |
|                         |                                                                                                                                                                |                  |                    |                      |           |                       |             |            |                                   | 0: Support from government or donors is required for business operations                                         |
|                         | <b>Cost recovery:</b> Are emptying and transport service providers able to cover their full operating costs due to revenue gains in the form of user charges?  | NA               | 1                  | 1                    | 0.5       | 0.5                   | 1           | 0.5        | 1                                 | 1: Full operating costs recovered                                                                                |
|                         |                                                                                                                                                                |                  |                    |                      |           |                       |             |            |                                   | 0.5: Most of operating costs recovered                                                                           |
|                         |                                                                                                                                                                |                  |                    |                      |           |                       |             |            |                                   | 0: Partial operating costs recovered                                                                             |
| Institutional and Legal | <b>Public Private partnership (PPP):</b> Is there a legal and regulatory framework that supports the business model through PPP?                               | NA               | 1                  | 0.5                  | 1         | 0.5                   | 1           | 0.5        | 1                                 | 1: The legal and regulatory framework that supports the business model exists and is being implemented           |
|                         |                                                                                                                                                                |                  |                    |                      |           |                       |             |            |                                   | 0.5: The legal and regulatory framework that supports the business model exists but not being implemented?       |
|                         |                                                                                                                                                                |                  |                    |                      |           |                       |             |            |                                   | 0: The legal and regulatory framework for the business model does not exist                                      |
|                         | <b>Legislation/ regulation:</b> Does the business model require close monitoring of service providers for regulatory compliance?                               | NA               | 0.5                | 0.5                  | 1         | 0.5                   | 0.5         | 0.5        | 0                                 | 1: Business model does not require close monitoring of service providers for regulatory compliance               |
|                         |                                                                                                                                                                |                  |                    |                      |           |                       |             |            |                                   | 0.5: Business model likely to require close monitoring of service providers for regulatory compliance            |
|                         |                                                                                                                                                                |                  |                    |                      |           |                       |             |            |                                   | 0: Business model requires close monitoring of service providers for regulatory compliance                       |
|                         | <b>Functionality of FSM service chain:</b> Does the business model improve functionality of FSM service chain and safeguard interest of multiple stakeholders? | NA               | 0.5                | 1                    | 0.5       | 1                     | 0.5         | 0.5        | 0.5                               | 1: Business model improves functionality of FSM and safeguards interests of multiple stakeholders                |
|                         |                                                                                                                                                                |                  |                    |                      |           |                       |             |            |                                   | 0.5: Business model partially improves functionality of FSM and safeguards interests of multiple stakeholders    |
|                         |                                                                                                                                                                |                  |                    |                      |           |                       |             |            |                                   | 0: Business model does not improve functionality of FSM and safeguard interests of multiple stakeholders         |

| Service criteria                | Sub-criteria                                                                                                                                                                                                                   | Business model   |                    |                      |           |                       |             |            |                                   | Scoring                                                                                                                  |
|---------------------------------|--------------------------------------------------------------------------------------------------------------------------------------------------------------------------------------------------------------------------------|------------------|--------------------|----------------------|-----------|-----------------------|-------------|------------|-----------------------------------|--------------------------------------------------------------------------------------------------------------------------|
|                                 |                                                                                                                                                                                                                                | Transfer station | Franchise (Zoning) | Scheduled desludging | Licensing | Incentivised disposal | Call center | Non-profit | Discreet collection and treatment |                                                                                                                          |
| Environmental and public health | <b>Environmental protection:</b> Does the business model address environmental pollution issues and concerns?                                                                                                                  | NA               | 0.5                | 0.5                  | 1         | 0.5                   | 1           | 0.5        | 0.5                               | 1: There is low risk of environmental pollution associated with business model and technology type                       |
|                                 |                                                                                                                                                                                                                                |                  |                    |                      |           |                       |             |            |                                   | 0.5: There is moderate risk of environmental pollution associated with business model and technology type                |
|                                 |                                                                                                                                                                                                                                |                  |                    |                      |           |                       |             |            |                                   | 0: There is high risk of environmental pollution associated with business model and technology type                      |
|                                 | <b>Public health safety:</b> Does the business model address public health safety issues and concerns?                                                                                                                         | NA               | 0.5                | 0.5                  | 0.5       | 0.5                   | 0.5         | 0.5        | 0.5                               | 1: There is low risk to public health safety with respect to business model and technology type                          |
|                                 |                                                                                                                                                                                                                                |                  |                    |                      |           |                       |             |            |                                   | 0.5: There is moderate risk to public health safety with respect to business model and technology type                   |
|                                 |                                                                                                                                                                                                                                |                  |                    |                      |           |                       |             |            |                                   | 0: There is high risk to public health safety with respect to business model and technology type                         |
| Technological                   | <b>Adaptability to the local context:</b> Does the business model promote use of emptying and transport technologies that can fully adapt to the local context (Informal settlements)?                                         | NA               | 0.5                | 0.5                  | 0.5       | 1                     | 1           | 1          | 0.5                               | 1: Faecal sludge emptying and transport technologies can fully adapt to the local context (informal settlements)         |
|                                 |                                                                                                                                                                                                                                |                  |                    |                      |           |                       |             |            |                                   | 0.5: Faecal sludge emptying and transport technologies are likely to adapt to the local context (informal settlements)   |
|                                 |                                                                                                                                                                                                                                |                  |                    |                      |           |                       |             |            |                                   | 0: Faecal sludge emptying and transport technologies are not fully adaptable to the local context (informal settlements) |
|                                 | <b>Responsiveness:</b> Does the business model shorten response time for customers to receive services?                                                                                                                        | NA               | 1                  | 1                    | 0         | 0.5                   | 1           | 1          | 0                                 | 1: Short response time for customers to receive emptying services                                                        |
|                                 |                                                                                                                                                                                                                                |                  |                    |                      |           |                       |             |            |                                   | 0.5: Moderate response time for customers to receive emptying services                                                   |
|                                 |                                                                                                                                                                                                                                |                  |                    |                      |           |                       |             |            |                                   | 0: Long response time for customers to receive emptying services                                                         |
|                                 | <b>Mixed technology adoption:</b> Does the business model promote use of mechanised and semi-mechanised emptying and transport technology options?                                                                             | NA               | 0.5                | 0.5                  | 1         | 1                     | 1           | 0.5        | 1                                 | 1: Business model promotes use of both mechanised (Cesspool) and semi-mechanised(Gulper) technology options              |
|                                 |                                                                                                                                                                                                                                |                  |                    |                      |           |                       |             |            |                                   | 0.5: Business model likely to promote use of only one technology option                                                  |
|                                 |                                                                                                                                                                                                                                |                  |                    |                      |           |                       |             |            |                                   | 0: Business model promotes manual emptying practices                                                                     |
| Social                          | <b>Equity/ Inclusion:</b> Does the business model promote equity or ensure inclusiveness in service provision so as to solve FSM problems in underserved communities and geographic areas where relatively higher need exists? | NA               | 1                  | 1                    | 0         | 0.5                   | 1           | 1          | 0                                 | 1: Business model promotes equity or ensures inclusiveness in service provision                                          |
|                                 |                                                                                                                                                                                                                                |                  |                    |                      |           |                       |             |            |                                   | 0.5: Business model is likely to promote equity or ensure inclusiveness in service provision                             |
|                                 |                                                                                                                                                                                                                                |                  |                    |                      |           |                       |             |            |                                   | 0: Business model does not promotes equity or ensure inclusiveness in service provision                                  |
|                                 | <b>Social stigma:</b> Does the business model address social stigma issues?                                                                                                                                                    | NA               | 0.5                | 0.5                  | 0.5       | 0.5                   | 0.5         | 0.5        | 0.5                               | 1: Social stigma associated with provision of emptying services and technology type is low                               |
|                                 |                                                                                                                                                                                                                                |                  |                    |                      |           |                       |             |            |                                   | 0.5: Social stigma associated with provision of emptying services and technology type is moderate                        |
|                                 |                                                                                                                                                                                                                                |                  |                    |                      |           |                       |             |            |                                   | 0: Social stigma associated with provision of emptying services and technology type is high                              |
| Scalability                     | Can the business model be fully scaled to other informal settlements within the city?                                                                                                                                          | NA               | 1                  | 1                    | 1         | 1                     | 1           | 0.5        | 0.5                               | 1: Business model can be fully scaled and replicated to other informal settlements within the city                       |
|                                 |                                                                                                                                                                                                                                |                  |                    |                      |           |                       |             |            |                                   | 0.5: Business model can be partly scaled and replicated to other informal settlements within the city                    |
|                                 |                                                                                                                                                                                                                                |                  |                    |                      |           |                       |             |            |                                   | 0: Business model cannot be scaled and replicated to other informal settlements within the city                          |

| Criteria                        |                    |                      |           |                       |             |            |                                   | Max score |
|---------------------------------|--------------------|----------------------|-----------|-----------------------|-------------|------------|-----------------------------------|-----------|
|                                 | Franchise (Zoning) | Scheduled desludging | Licensing | Incentivised disposal | Call center | Non-profit | Discreet collection and treatment |           |
| Financial                       | 2.5                | 3                    | 1         | 2                     | 3           | 0.5        | 3                                 | 4         |
| Institutional and Legal         | 2                  | 2                    | 2.5       | 2                     | 2           | 1.5        | 1.5                               | 3         |
| Environmental and public health | 1                  | 1                    | 1.5       | 1                     | 1.5         | 1          | 1                                 | 2         |
| Technological                   | 2                  | 2                    | 1.5       | 2.5                   | 3           | 2.5        | 1.5                               | 3         |
| Social                          | 1.5                | 1.5                  | 0.5       | 1                     | 1.5         | 1.5        | 0.5                               | 2         |
| Scalability                     | 1                  | 1                    | 1         | 1                     | 1           | 0.5        | 0.5                               | 1         |
| Over all                        | 10                 | 10.5                 | 8         | 9.5                   | 12          | 7.5        | 8                                 | 15        |

| Criteria                        |                    |                      |           |                       |             |            |                                   |
|---------------------------------|--------------------|----------------------|-----------|-----------------------|-------------|------------|-----------------------------------|
|                                 | Franchise (Zoning) | Scheduled desludging | Licensing | Incentivised disposal | Call center | Non-profit | Discreet collection and treatment |
| Financial                       | 63%                | 75%                  | 25%       | 50%                   | 75%         | 13%        | 75%                               |
| Institutional and Legal         | 67%                | 67%                  | 83%       | 67%                   | 67%         | 50%        | 50%                               |
| Environmental and public health | 50%                | 50%                  | 75%       | 50%                   | 75%         | 50%        | 50%                               |
| Technological                   | 67%                | 67%                  | 50%       | 83%                   | 100%        | 83%        | 50%                               |
| Social                          | 75%                | 75%                  | 25%       | 50%                   | 75%         | 75%        | 25%                               |
| Scalability                     | 100%               | 100%                 | 100%      | 100%                  | 100%        | 50%        | 50%                               |
| Over all                        | 67%                | 70%                  | 53%       | 63%                   | 80%         | 50%        | 53%                               |
